# Supplementary material
Source: HighWire-hosted journal article supplement (doi:10.1101/rna.079148.122)
Supplement: Supplementary_tables_S2-S3-S4.xlsx [file Supplementary_tables_S2-S3-S4.xlsx]

## Sheet: Table S2 kobs details
	Rz Yl1	Rz Yl2	Rz WT Yl	Rz WT mouse gut	1	2	3	4	5	7	8	9	10	11	12	13	13 mut	13 mut comp	hhd N/O	GlmS2 Na	GlmS2 K	GlmS WT Na	GlmS WT K
One phase decay
Best-fit values
Y0	-0.004918	0.003493	0.0142	0.007029	-0.05373	-0.024	0.009924	0.222	0.06791	-0.0001415	-0.004177	-0.005346	0.007177	0.0464	0.02529	0.01074	-0.002995	0.01132	-0.004632	-0.0009813	-0.01425	0.003318	0.003759
PLATEAU	0.7049	1	0.6464	0.2956	0.8136	0.2198	0.7764	5.657e-16	0.7307	0.06577	0.1314	0.1317	0.5731	0.6144	0.2342	0.5836	0.385	0.3707	1	0.5634	0.4867	0.7788	0.7477
K	0.008324	0.004655	0.3535	3.016	0.08101	0.3379	0.2986	0.008138	0.1533	0.04704	0.05252	0.05256	0.03509	0.5442	0.5412	1.669	0.07876	1.506	0.002464	0.05249	0.04134	1.379	1.301
Half Life	83.27	148.9	1.961	0.2299	8.557	2.051	2.322	85.18	4.52	14.74	13.2	13.19	19.75	1.274	1.281	0.4153	8.801	0.4602	281.3	13.2	16.77	0.5027	0.533
Tau	120.1	214.8	2.829	0.3316	12.34	2.959	3.349	122.9	6.521	21.26	19.04	19.03	28.5	1.838	1.848	0.5992	12.7	0.6639	405.8	19.05	24.19	0.7252	0.7689
Span	-0.7099	-0.9965	-0.6322	-0.2886	-0.8673	-0.2438	-0.7665	0.222	-0.6628	-0.06591	-0.1356	-0.137	-0.5659	-0.568	-0.2089	-0.5728	-0.388	-0.3594	~ -1.005	-0.5644	-0.501	-0.7754	-0.744
Std. Error
Y0	0.004299	0.002509	0.03259	0.02518	0.03437	0.01537	0.005997	0,1324 to 0,3281	0.0339	0.0004395	-0,007926 to -0,0004659	0.00225	0.002348	0.02959	0.0193	0.01454	0.002893	0.02106	0.003823	0.004199	0.004898	0.04515	0.04171
PLATEAU	0.2704	0.5042	0.02725	0.01009	0.06038	0.01223	0.005062	??? to 0,3058	0.04005	0.001289	0,1224 to 0,1418	0.005818	0.01022	0.01904	0.01245	0.006484	0.005191	0.009618	2.744	0.008528	0.01344	0.01999	0.0186
K	0.004035	0.002702	0.06647	0.6439	0.01737	0.07445	0.00845	???	0.03415	0.002326	0,04328 to 0,06296	0.005901	0.001406	0.08663	0.153	0.09987	0.003216	0.2106	0.007244	0.002172	0.002734	0.2376	0.2093
Span	0.2686	0.503	0.03978	0.02679	0.06343	0.01824	0.007268	???	0.04811	0.00125	11,01 to 16,02	0.005708	0.009765	0.03312	0.02161	0.01553	0.005425	0.02252	2.742	0.00839	0.01273	0.04906	0.04534
95% Confidence Intervals								???			15,88 to 23,11
Y0	-0,01509 to 0,005250	-0,002439 to 0,009425	-0,06287 to 0,09127	-0,05252 to 0,06658	-0,1350 to 0,02754	-0,06033 to 0,01233	-0,004256 to 0,02410		-0,01226 to 0,1481	-0,001181 to 0,0008980		-0,01067 to -2,474e-005	0,001624 to 0,01273	-0,02357 to 0,1164	-0,02035 to 0,07092	-0,02363 to 0,04512	-0,009837 to 0,003847	-0,03848 to 0,06111	-0.01367 to 0.004408	-0.01178 to 0.009813	-0.02684 to -0.001653	-0.1128 to 0.1194	-0.1035 to 0.1110
PLATEAU	0,06536 to 1,345	-0,1922 to 1,000	0,5820 to 0,7109	0,2718 to 0,3195	0,6708 to 0,9563	0,1909 to 0,2487	0,7645 to 0,7884	7	0,6360 to 0,8255	0,06272 to 0,06882		0,1179 to 0,1454	0,5489 to 0,5973	0,5694 to 0,6594	0,2048 to 0,2637	0,5682 to 0,5989	0,3727 to 0,3973	0,3479 to 0,3934	-1.000 to 1.000	0.5415 to 0.5854	0.4522 to 0.5213	0.7274 to 0.8301	0.6999 to 0.7956
K	0,0 to 0,01787	0,000 to 0,01104	0,1963 to 0,5107	1,493 to 4,538	0,03993 to 0,1221	0,1619 to 0,5140	0,2786 to 0,3185	0.1023	0,07258 to 0,2341	0,04154 to 0,05254		0,03860 to 0,06651	0,03176 to 0,03841	0,3393 to 0,7491	0,1794 to 0,9030	1,433 to 1,905	0,07115 to 0,08636	1,008 to 2,004	0,000 to 0,01959	0.04691 to 0.05808	0.03431 to 0.04837	0.7681 to 1.990	0.7625 to 1.839
Half Life		62,76 to +infinity	1,357 to 3,532	0,1527 to 0,4643	5,678 to 17,36	1,349 to 4,282	2,176 to 2,488	0.07105	2,961 to 9,550	13,19 to 16,69		10,42 to 17,96	18,04 to 21,82	0,9253 to 2,043	0,7676 to 3,864	0,3639 to 0,4838	8,026 to 9,742	0,3458 to 0,6874	35.38 to +infinity	11.93 to 14.78	14.33 to 20.20	0.3484 to 0.9024	0.3770 to 0.9091
Tau		90,55 to +infinity	1,958 to 5,095	0,2203 to 0,6698	8,191 to 25,04	1,946 to 6,177	3,139 to 3,590	0.1007	4,272 to 13,78	19,03 to 24,08		15,04 to 25,91	26,03 to 31,48	1,335 to 2,947	1,107 to 5,574	0,5249 to 0,6980	11,58 to 14,06	0,4989 to 0,9917	51.04 to +infinity	17.22 to 21.32	20.68 to 29.15	0.5026 to 1.302	0.5439 to 1.312
Span	-1,345 to -0,07466	-2,186 to 0,1930	-0,7263 to -0,5382	-0,3519 to -0,2252	-1,017 to -0,7173	-0,2869 to -0,2007	-0,7837 to -0,7493		-0,7766 to -0,5491	-0,06887 to -0,06296		-0,1505 to -0,1235	-0,5890 to -0,5428	-0,6463 to -0,4897	-0,2601 to -0,1578	-0,6096 to -0,5361	-0,4008 to -0,3752	-0,4126 to -0,3061	-7.489 to 5,480	-0.5860 to -0.5429	-0.5337 to -0.4683	-0.9016 to -0.6493	-0.8605 to -0.6274
Goodness of Fit								Y0 > 0
Degrees of Freedom	7	7	7	7	7	7	7	Plateau > 0	7	7	7	7	7	7	7	7	7	7	7	5	5	5	5
R²	0.992	0.9963	0.9732	0.9447	0.9701	0.963	0.9994	K > 0	0.9651	0.9987	0.9965	0.993	0.9994	0.9782	0.9346	0.9953	0.9989	0.9756	0.9741	0.9992	0.9984	0.9804	0.9818
Absolute Sum of Squares	0.0006759	0.0002335	0.01729	0.004533	0.0311	0.003419	0.0005533		0.02392	5.887e-06	7.436e-05	0.0001505	0.0001774	0.01004	0.00428	0.001634	0.0002224	0.003504	0.000542	0.0002253	0.000328	0.01022	0.008732
Sy.x	0.009826	0.005775	0.0497	0.02545	0.06666	0.0221	0.008891		0.05845	0.0009171	0.003259	0.004636	0.005034	0.03786	0.02473	0.01528	0.005636	0.02237	0.0088	0.006713	0.0081	0.04521	0.04179
Constraints								10
K	K > 0,0	Abs(Plateau) < 1	K > 0,0	K > 0	K > 0	K > 0	K > 0	K > 0,0	K > 0,0	K > 0,0	K > 0	K > 0,0	K > 0,0	K > 0,0	K > 0,0	K > 0,0	K > 0,0	K > 0,0	K > 0,0	K > 0.0	K > 0.0	K > 0.0	K > 0.0
Number of points Analyzed		K > 0
note that in cases where the plateau is indicated as exactly 1, it was manually set to 1 because it was otherwise estimated as more (which is theoritically not possible for single turnover kinetics)

## Sheet: Table S3 glmS_seq_comparison
# Percent Identity Matrix - created by Clustal2.1
from the seed alignment of Rfam for the glmS ribozyme
				glmS1	glmS2	AE001437.1/179915-180075	CP000924.1/498335-498489	AE008691.1/2101605-2101448	glmS_Klein	AE016830.1/2055460-2055313	CP001617.1/730337-730488	AP006716.1/888948-889158	AF270378.1/2268-2051	AC078934.3/32621-32405	AP008934.1/759374-759589	AM263198.1/720655-720850	AARQ02000011.1/391-585	AL596166.1/50734-50929	AE017262.2/770944-771139	CP000557.1/163698-163870	BA000043.1/166978-167147	AE017333.1/183152-183325	AB006424.1/2989-3156	FJ935779.1/2022-2192		sum of the pairwise percent identities for all sequences
		01:00:00	glmS1	100	63.09	41.91	43.61	45.93	44.44	50.86	46.61	47.26	46.58	45.89	44.83	43.84	43.84	44.9	44.22	50.74	50	45.11	46.92	49.24		1039.82
		02:00:00	glmS2	63.09	100	43.38	49.25	53.68	51.85	44.44	42.02	49.32	45.89	50.68	52.41	53.1	52.41	52.05	52.05	52.59	53.38	47.73	46.88	49.62		1105.82
		03:00:00	AE001437.1/179915-180075	41.91	43.38	100	63.64	65.58	63.01	47.11	46.34	53.21	61.15	60.39	60.78	51.61	50.97	50	51.28	51.92	52.29	62.34	59.73	61.84		1198.48
		04:00:00	CP000924.1/498335-498489	43.61	49.25	63.64	100	88.31	88.11	55.93	57.98	53.33	51.32	51.35	51.7	52	50.67	52	51.33	56.67	58.11	54.73	50.69	52.38		1233.11
		05:00:00	AE008691.1/2101605-2101448	45.93	53.68	65.58	88.31	100	96.58	52.94	56.2	51.32	56.86	54	54.36	50.99	49.01	50.66	49.34	52.94	53.64	53.33	51.37	53.02		1240.06
		06:00:00	glmS_Klein	44.44	51.85	63.01	88.11	96.58	100	52.07	54.84	48.98	52.03	51.03	52.78	49.66	47.62	48.65	47.3	53.69	53.42	51.37	51.43	53.15		1212.01
		07:00:00	AE016830.1/2055460-2055313	50.86	44.44	47.11	55.93	52.94	52.07	100	68.71	48.92	51.41	52.11	48.92	55.91	55.12	54.33	55.12	55.74	57.98	56.78	54.39	55.56		1174.35
		08:00:00	CP001617.1/730337-730488	46.61	42.02	46.34	57.98	56.2	54.84	68.71	100	48.25	53.1	50	46.53	51.16	51.16	53.08	52.31	52.8	54.92	53.72	52.99	54.17		1146.89
		09:00:00	AP006716.1/888948-889158	47.26	49.32	53.21	53.33	51.32	48.98	48.92	48.25	100	77.34	77.4	70.1	55.98	54.64	55.43	54.35	54.6	56.25	56.6	55.56	57.05		1225.89
		10:00:00	AF270378.1/2268-2051	46.58	45.89	61.15	51.32	56.86	52.03	51.41	53.1	77.34	100	84.21	77.4	59.04	59.36	61.5	59.36	57.93	56.52	60.62	61.04	62.42		1295.08
		11:00:00	AC078934.3/32621-32405	45.89	50.68	60.39	51.35	54	51.03	52.11	50	77.4	84.21	100	79.81	62.84	62.09	62.84	60.66	59.01	59.49	60.51	60.93	62.34		1307.58
		12:00:00	AP008934.1/759374-759589	44.83	52.41	60.78	51.7	54.36	52.78	48.92	46.53	70.1	77.4	79.81	100	61.67	61.45	62.22	62.22	60	59.87	59.62	60	62.75		1289.42
		13:00:00	AM263198.1/720655-720850	43.84	53.1	51.61	52	50.99	49.66	55.91	51.16	55.98	59.04	62.84	61.67	100	93.85	93.85	95.38	63.03	62.58	60.84	62.5	63.8		1343.63
		14:00:00	AARQ02000011.1/391-585	43.84	52.41	50.97	50.67	49.01	47.62	55.12	51.16	54.64	59.36	62.09	61.45	93.85	100	94.87	96.41	64.02	63.58	61.21	62.26	63.58		1338.12
		15:00:00	AL596166.1/50734-50929	44.9	52.05	50	52	50.66	48.65	54.33	53.08	55.43	61.5	62.84	62.22	93.85	94.87	100	94.39	63.64	64.42	60.84	62.5	63.8		1345.97
		16:00:00	AE017262.2/770944-771139	44.22	52.05	51.28	51.33	49.34	47.3	55.12	52.31	54.35	59.36	60.66	62.22	95.38	96.41	94.39	100	63.03	63.19	61.45	63.13	64.42		1340.94
		17:00:00	CP000557.1/163698-163870	50.74	52.59	51.92	56.67	52.94	53.69	55.74	52.8	54.6	57.93	59.01	60	63.03	64.02	63.64	63.03	100	95.29	74.25	72.67	73.78		1328.34
		18:00:00	BA000043.1/166978-167147	50	53.38	52.29	58.11	53.64	53.42	57.98	54.92	56.25	56.52	59.49	59.87	62.58	63.58	64.42	63.19	95.29	100	75.9	73.75	74.23		1338.81
		19:00:00	AE017333.1/183152-183325	45.11	47.73	62.34	54.73	53.33	51.37	56.78	53.72	56.6	60.62	60.51	59.62	60.84	61.21	60.84	61.45	74.25	75.9	100	85.12	85.38		1327.45
		20:00:00	AB006424.1/2989-3156	46.92	46.88	59.73	50.69	51.37	51.43	54.39	52.99	55.56	61.04	60.93	60	62.5	62.26	62.5	63.13	72.67	73.75	85.12	100	96.43		1330.29
		21:00:00	FJ935779.1/2022-2192	49.24	49.62	61.84	52.38	53.02	53.15	55.56	54.17	57.05	62.42	62.34	62.75	63.8	63.58	63.8	64.42	73.78	74.23	85.38	96.43	100		1358.96
glmS1 and glmS2 are highlighted in yellow
glmS model from Klein and Ferré D'Amarré, 2006 is highilighted in gray
red cells correspond to lowest percent identity and green cells to highest
Sequences are sorted from the lowest sum of pairwise percent identities with all other sequences, from lowest to highest. It can be noted that the two lowest sums are for glmS1 and glmS2, which can thus be considered farthest from all natural glmS ribozymes in general.
It can also be noted that even if they are based on the Klein and Ferré D'Amarré, 2006 as a template (and are thus expected to have no gaps in the alignment with that sequence), more than half of the sequences from the seed alignment have higher percent identities with the sequence from Klein 2006.
In other words, glmS1 and glmS2 are the two sequences most different from the other sequences from this seed alignment, which represents a diverse set of sequences from the known glmS instance

## Sheet: Table S4 Ensemble defect
	free energy at 17	free energy at 27	free energy at 37	free energy at 47	free energy at 57	normal defect at 17	normal defect t 27	normal defect at 37	normal defect at 47	normal defect at 57	designed at	designed using	measured using
HHRz_1	-26.17	-20.23	-14.3	-8.36	-2.42	0.202	0.1756	0.1872	0.223	0.2707	37	mathews + dirks	turner + dirks
HHRz_2	-29.86	-23.88	-17.9	-11.91	-5.93	0.4426	0.3953	0.3542	0.349	0.4061	37	mathews + dirks	turner + dirks
HHRz_3	-25.07	-19.88	-14.7	-9.51	-4.32	0.1275	0.1191	0.1237	0.1639	0.2748	37	mathews + dirks	turner + dirks
HHRz_4	-38.39	-31.84	-25.3	-18.75	-12.2	0.08019	0.08055	0.09329	0.1088	0.1174	37	mathews + dirks	turner + dirks
HHRz_5	-39.49	-32.79	-26.1	-19.4	-12.7	0.08011	0.07513	0.076	0.08441	0.09043	37	turner+ dirks	turner + dirks
HHRz_6	-37.07	-30.58	-24.1	-17.61	-11.12	0.1078	0.1009	0.099	0.1071	0.1338	37	turner+ dirks	turner + dirks
HHRz_7	-38.78	-32.34	-25.9	-19.458	-13.01	0.1131	0.1075	0.1008	0.095	0.09154	47	turner+ dirks	turner + dirks
HHRz_8	-39.57	-32.88	-26.2	-19.5129	-12.82	0.08947	0.08559	0.08542	0.091	0.09849	47	turner+ dirks	turner + dirks
HHRz_9	-37.23	-30.86	-24.5	-18.13	-11.7642	0.1319	0.1221	0.1118	0.1033	0.1	57	turner+ dirks	turner + dirks
HHRz_10	-40.86	-34.23	-27.6	-20.96	-14.3355	0.09162	0.08836	0.0885	0.09311	0.097	57	turner+ dirks	turner + dirks
HHRz_11	-35.96	-29.584	-23.2	-16.8	-10.43	0.08616	8.20-E02	0.08559	0.101	0.1212	27	turner+ dirks	turner + dirks
HHRz_12	-40.24	-33.6226	-27	-20.37	-13.75	0.08022	7.70-E02	0.08381	0.0968	0.1029	27	turner+ dirks	turner + dirks
HHRz_13	-36.9096	-30.15	-23.4	-16.64	-9.89	7.90-E02	0.07559	0.07941	0.107	0.2105	17	turner+ dirks	turner + dirks
HHRz_14	-36.9261	-30.51	-24.1	-17.68	-11.27	8.00-E02	0.07809	0.08618	0.1015	0.1166	17	turner+ dirks	turner + dirks
% Sodium concentration: 1.0000 M
% Magnesium concentration: 0.0000 M
	..[[[[[.....(((((......(((..]]]]].......)))..(((((((......))))))).)))))..........
observation 1: for all sequences, regardless of the design temperature, the predicted free energy increases monotonicaly when the folding temperature is increased (i.e a sequence that is solid at lower temperatures becomes instable at higher temperatures
observation 2: observation 1 does not hold when we consider normalized ensemble defect instead of free energy. This implies that more stable does not necessarily imply less defective. (molecule could be stable but badly folded)
observation 3: the predicted normalized ensemble defect tends to be higher when measured using the turner model
	red cells mark the least defective compared to other folding temperatures
	blue cells mark the most stable molecule compared to other temperatures
HHRz_1
normal defect	0.202	0.1756	0.1872	0.223	0.2707
energy	-26.17	-20.23	-14.3	-8.36	-2.42
temperature	17	27	37	47	57
	sequence	measurement temperature	normalized ensemble defect measured by rna1995 at variable C	normalized ensemble defect measured by rna1999 at 37 C	free energy measured by rna1999 at 37 C
wild type	GGUACCGAAUAAAUCCCCUGAUGAGCAACGGUGAGAGCCGGCGAAACUACCCAAACAAGGGUAGUCGGGAUAGUACCAUAA	37	-	0.3802	-2.48
		17	0.4526	-	-
		27	0.4359	-	-
		37	0.4209	-	-
		47	0.3975	-	-
		57	0.3663	-	-
